# Supplementary material
Source: MDPI journal article supplement (https://www.mdpi.com/2073-4395/14/5/1050)
Supplement: s1 [file s1]

## Supplementary Material

**Table S1.** qRT-PCR primers used in this study.

| primer name         | sequence(5'-3')              |
|---------------------|------------------------------|
| <i>OsActin</i> - F  | TGTATGCCAGTGGTCGTACCA        |
| <i>OsActin</i> - R  | CCAGCAAGGTCGAGACGAA          |
| <i>OsDREB2A</i> - F | AGATTGCTCCGTGCAAGTG          |
| <i>OsDREB2A</i> - R | CTGGAGCTTCTGGTTTTGCT         |
| <i>OsDREB2B</i> - F | TTTGTGGAAAGGCGACAAG          |
| <i>OsDREB2B</i> - R | TGGATCAACCCCTTCGTAGT         |
| <i>OsRD22</i> - F   | ATCTTGGCGCCTGATCGAG          |
| <i>OsRD22</i> - R   | AAAGAACCAAATTGCGTGCAT        |
| <i>OsRD29A</i> -F   | TGGATCAAACAGAGGAACCA         |
| <i>OsRD29A</i> - R  | CATCTTAGTCGCACCATTCTCA       |
| <i>OsABI5</i> - F   | AGTGGCACACTCATCCTGCTT        |
| <i>OsABI5</i> - R   | TGAAAGAAGACTTAATGTGCAAATCC   |
| <i>OsNCED2</i> - F  | TCCGTTGCCCAAGATCAAG          |
| <i>OsNCED2</i> - R  | CGTCCAACCGTGCAATCAC          |
| <i>OsNCED4</i> - F  | GATTGCACGGCACCTTCATT         |
| <i>OsNCED4</i> - R  | CTCTGTAATTTGATTTTCACTGGCTAAT |
| <i>OsNCED5</i> - F  | CCCAGCTTGAAGCTTTTGCT         |
| <i>OsNCED5</i> - R  | ACAACACTGCAACTATCCCTATCACT   |
